# Supplementary material for: Extracting biologically significant patterns from short time series gene expression data
Source: PubMed Central journal article supplement (PMC2743670; doi:10.1186/1471-2105-10-255), 2009-08-20
Supplement: 1471-2105-10-255-S1.pdf [file 1471-2105-10-255-S1.pdf]

## SUPPLEMENTARY MATERIALS for the paper

Alain B. Tchagang, Kevin V. Bui, Thomas McGinnis, Panayiotis V. Benos,  
“**Extracting biologically significant patterns from short time series gene expression data**”

### *ASTRO* pseudo code

---

#### **Input**

- $A_0$  = raw gene expression data,
- $G$  = set of genes
- $T$  = set of sample time points
- $\varepsilon$  = filtering threshold

#### **Output**

- $C\{k\}$  = coherent clusters
- $I\{k\}$  = set of genes in clusters
- $J\{k\}$  = set of time points in clusters

#### **Begin**

```
 $A = \mathbf{filter}(A_0, \varepsilon); [N, M] = \mathbf{size}(A);$  % remove constant genes.  
 $R = \mathbf{rank}(A); [N_R, M_R] = \mathbf{size}(R);$  % rank matrix construction.  
 $U = \mathbf{union}(R, R, 'rows'); [N_U, M_U] = \mathbf{size}(U);$  % identify sets of distinct patterns.  
For  $k = 1:N_U$   
    For  $n = 1:N_R$   
        If  $R(n, :) == U(k, :)$   
             $C\{k\} = [C\{k\}; A(n, :)]$   
             $I\{k\} = [I\{k\}; G(n)];$   
        End If  
    End For;  $J\{k\} = T;$   
End For  
End begin
```

---

## MiMeSR pseudo code

---

### Input

- $A_0$  = raw gene expression data,
- $G$  = set of genes
- $T$  = set of sample time points
- $\varepsilon$  = filtering threshold
- $I_0$  = minimum number of genes in a cluster

### Output

- $C\{k\}$  = minimum mean squared residue clusters
- $I\{k\}$  = set of genes in clusters
- $J\{k\}$  = set of time points in clusters

### Begin

$A = \mathbf{filter}(A_0, \varepsilon)$ ;  $[N, M] = \mathbf{size}(A)$ ;  $k = 0$ ;  $X = [0]$ ;

**For**  $n = 1:N$

**If**  $n \notin X$

- Construct  $Z_1$ , using row  $n$  of  $A$ .
- $Z_2 = A - Z_1$
- $\mathbf{Index} = \mathbf{find}(\mathbf{max}(Z_2') - \mathbf{min}(Z_2') < \varepsilon)$
- **If**  $\mathbf{Index} \geq I_0$ 
  - $k = k + 1$ ;
  - $C\{k\} = A(\mathbf{Index}, :)$ ;
  - $I\{k\} = G(\mathbf{Index})$ ;
  - $J\{k\} = T$ ;
- **End If**
- $X = \mathbf{union}(X, \mathbf{Index})$

**End If**

**End For**

**End begin**

---
